# Supplementary material for: A hierarchical CuO@NiCo layered double hydroxide core–shell nanoarray as an efficient electrocatalyst for the oxygen evolution reaction
Source: Royal Society of Chemistry journal article supplement (doi:10.1039/d1qi00124h), 2021-01-01
Supplement: d1qi00124h1.pdf [file d1qi00124h1.pdf]

## Electronic Supplementary Information

### Experimental section

**Materials:** All chemicals, including Hydrochloric acid (HCl), ethanol (C<sub>2</sub>H<sub>5</sub>OH), sodium hydroxide (NaOH), ammonium persulfate [(NH<sub>4</sub>)<sub>2</sub>S<sub>2</sub>O<sub>8</sub>], Cobalt(II) chloride hexahydrate (Co(Cl)<sub>2</sub>·6H<sub>2</sub>O), Nickel nitrate hexahydrate (Ni(NO<sub>3</sub>)<sub>2</sub>·6H<sub>2</sub>O), potassium hydroxide (KOH) and Cu foil (CF) (thickness: 0.1mm, purity: Cu ≥ 99.99%) were purchased from commercial suppliers and used without further purification. Milli-Q ultrapure water of 18.25 MΩ.cm was applied in all experiments.

**Preparation of the CuO/CF, CuO@NiCo LDH/CF, and NiCo LDH/CF:** A piece of CF with a size of 1 × 1 cm<sup>2</sup> was cleaned in 2 M HCl and then cleaned ultrasonically in ethanol and deionized water, each for 15 min. The cleaned CF was then immersed into 50 mL of an aqueous solution (AOES) containing 5 g NaOH and 1.428 g (NH<sub>4</sub>)<sub>2</sub>S<sub>2</sub>O<sub>8</sub> for 20 min. After that, CF with a light blue color was taken out from the solution, rinsed with deionized water, and dried in the air, followed by air annealing at 180 °C for 2 h at a speed of 2 °C min<sup>-1</sup> to obtain CuO/CF. The electrodeposition of NiCo LDH was carried out in a three-electrode system with using CuO/CF as the working electrode, a saturated calomel electrode (SCE) as the reference electrode, and Pt slice as the counter electrode. The electrolyte was obtained by dissolving Ni(NO<sub>3</sub>)<sub>2</sub>·6H<sub>2</sub>O (1.0905 g) and CoCl<sub>2</sub>·6H<sub>2</sub>O (0.89 g) in 25 mL water. The applied potential was -1.0 V vs. SCE and electrodeposition time with 50 s. The samples were then washed with deionized water and dried in the air. NiCo LDH/CF was similarly prepared on CF.

**Preparation of the RuO<sub>2</sub>/CF:** to assemble RuO<sub>2</sub> on CF, 5mg commercial RuO<sub>2</sub> was diffused in a mixture solution encompassing 15 μL of 5 wt% Nafion, 85 μL DI water and 100 μL ethanol under increasing stirring for 20 min. Afterward, the as-prepared RuO<sub>2</sub> solution was painted onto CF. Then RuO<sub>2</sub>/CF was dried in an oven at 60 °C for 2h.

**Characterizations:** XRD patterns were obtained from a Shimadzu XRD-6100 diffractometer with Cu Kα radiation (40 kV, 30 mA) of wavelength 0.154 nm (Japan). TEM images were obtained from a Zeiss Libra 200FE transmission electron

microscope operated at 200 kV. XPS measurements were performed on an ESCALABMK II X-ray photoelectron spectrometer using Mg as the exciting source. SEM measurements were carried out on an XL30 ESEM FEG scanning electron microscope at an accelerating voltage of 20 kV. Inductively coupled plasma mass 2 spectrometry (ICP-MS) measurement was carried out on Agilent 7700s.

**Electrochemical measurements:** Electrochemical measurements were performed with a CHI 660E potentiostat (CH Instruments, China) in a standard three-electrode setup with the prepared samples as the working electrode, a graphite rod as the counter electrode, the Hg/HgO electrode as the reference electrode. The OER activity was evaluated using linear sweep voltammetry (LSV) with a sweep rate of 5 mV s<sup>-1</sup>. Electrochemical impedance spectroscopy (EIS) was measured at a frequency between 0.1 Hz and 10<sup>6</sup> Hz. The tests were performed in a 1 M KOH solution. All the potentials were displayed versus reversible hydrogen electrode (RHE) by:  $E(\text{RHE}) = E(\text{Hg/HgO}) + 0.098 + 0.059 \times \text{pH}$ . The 100% iR-corrected was applied in the LSV and chronopotentiometry experiments.

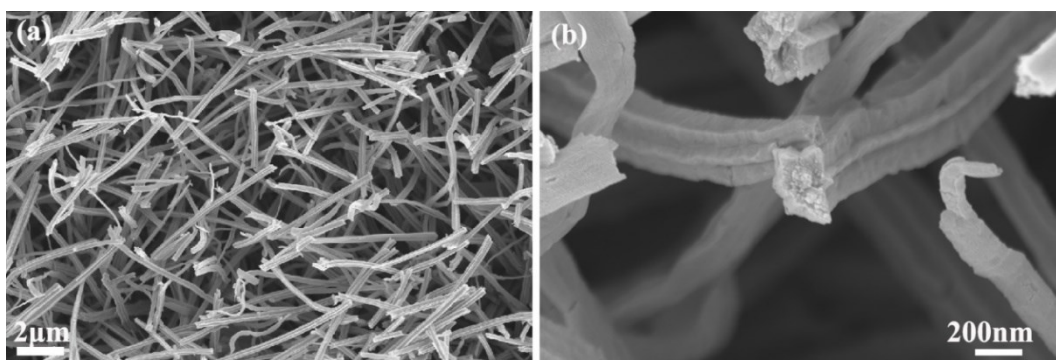

**Fig. S1.** SEM images for CuO /CF.

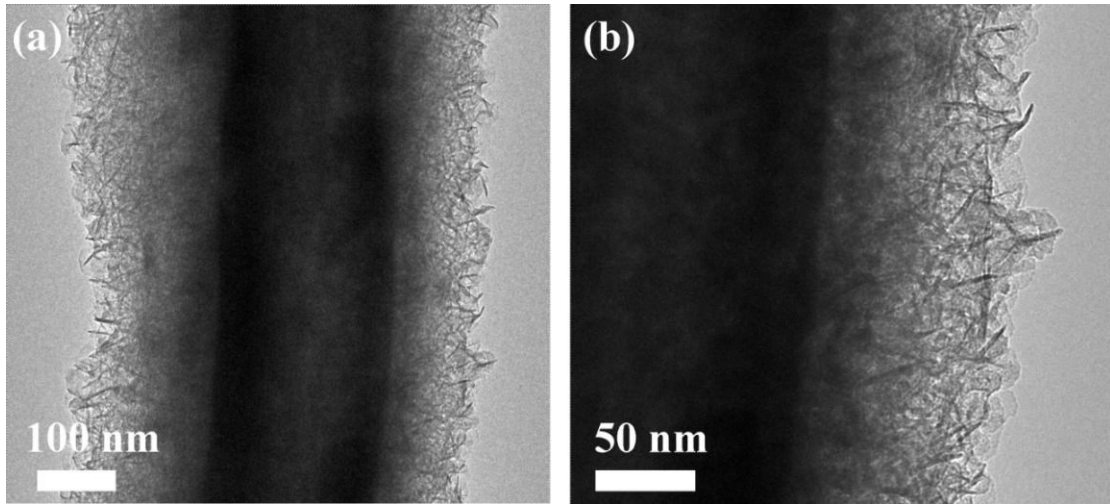

**Fig. S2.** HRTEM images of CuO@NiCo LDH nanowire.

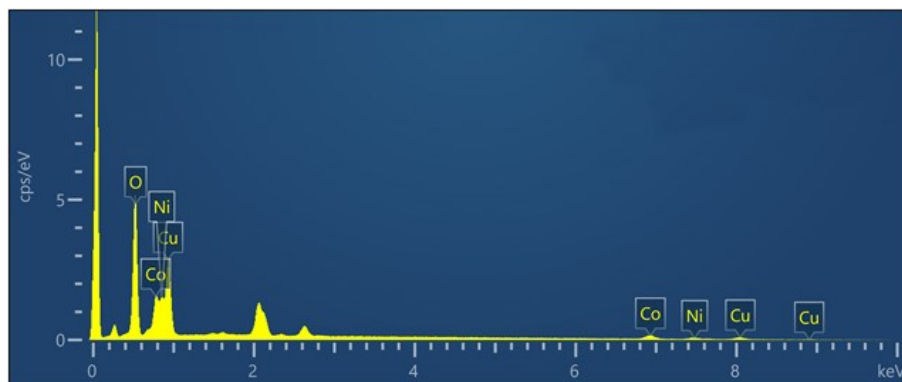

**Fig. S3.** EDX spectrum for CuO@ NiCo LDH/CF.

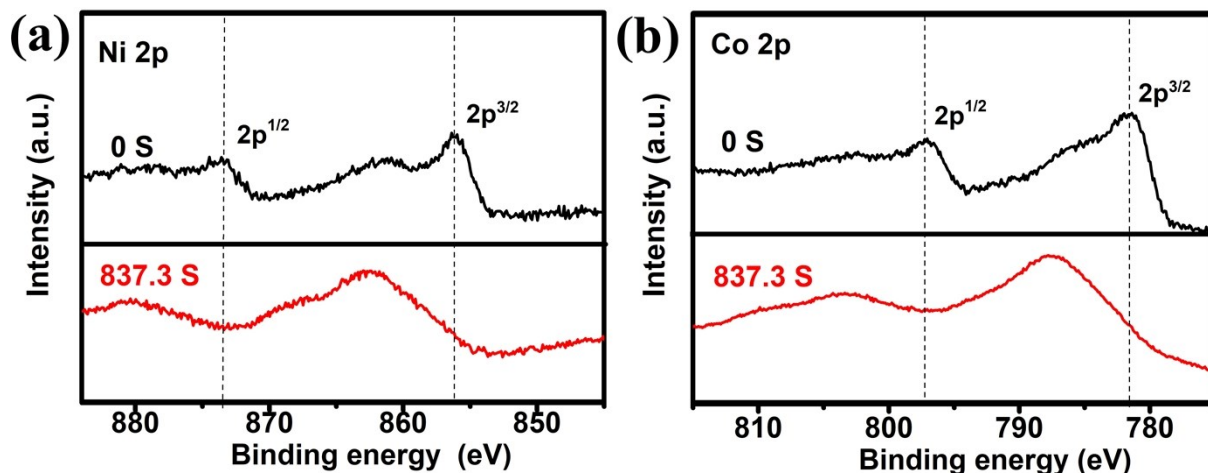

**Fig. S4.** Depth-resolved XPS analysis of CuO@NiCo LDH in the (a) Ni 2p; (b) Co 2p region. The times show the duration of a surface etching by the X-ray beam.

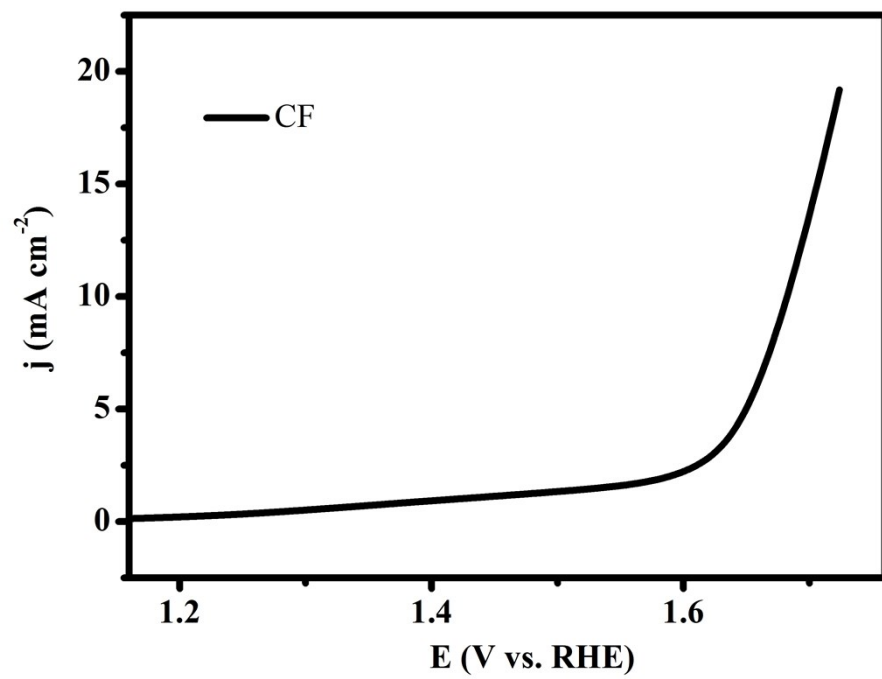

**Fig. S5.** Polarization curves of CF for OER with a scan rate of  $5 \text{ mV s}^{-1}$ .

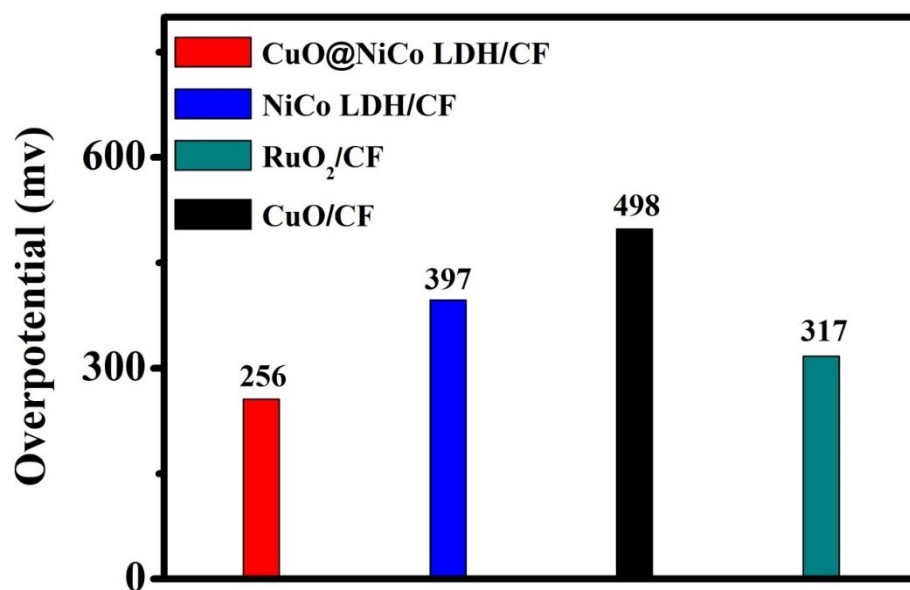

**Fig. S6.** Overpotential values needed for achieving fixed geometric catalytic current densities of 20 mA cm<sup>-2</sup> for CuO@NiCo LDH/CF, NiCo LDH/CF, RuO<sub>2</sub>/CF, and CuO/CF, respectively.



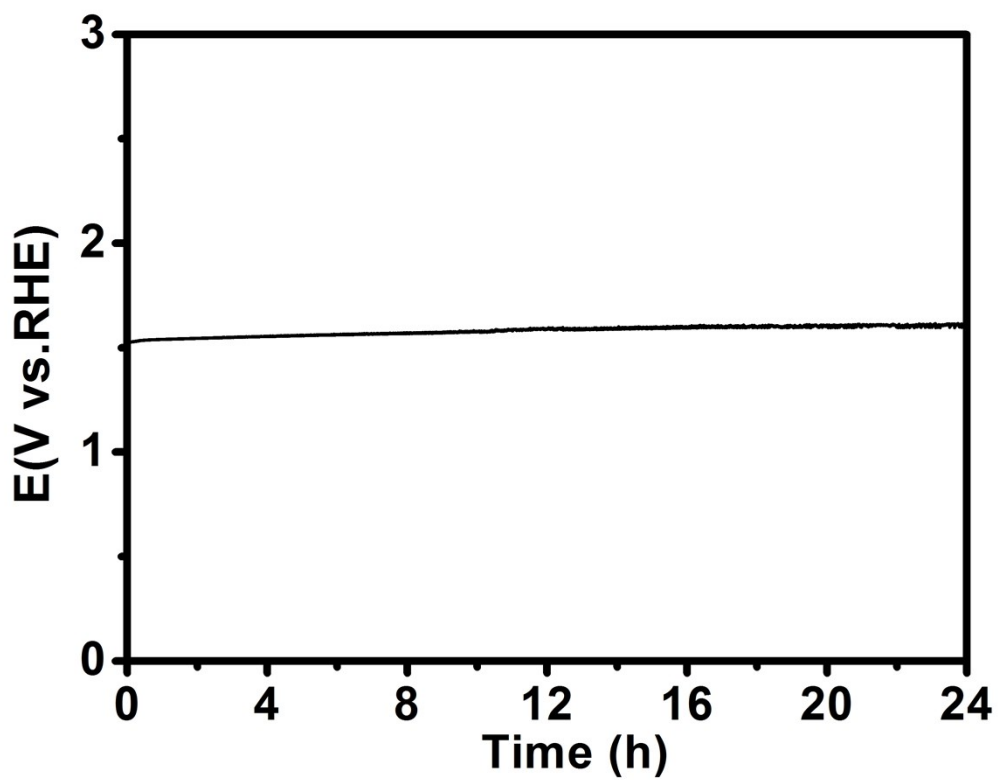

**Fig. S7.** Constant current chronopotentiometric stability measurements at a current density of  $20 \text{ mA cm}^{-2}$  (without  $iR$  correction).

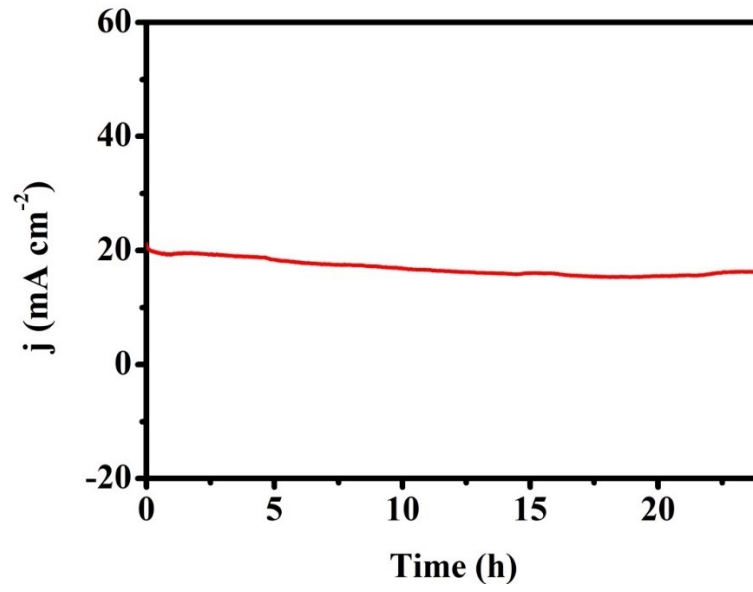

**Fig. S8.** Time-dependent current density curve for CuO@NiCo LDH/CF at 1.51 V (without iR correction).

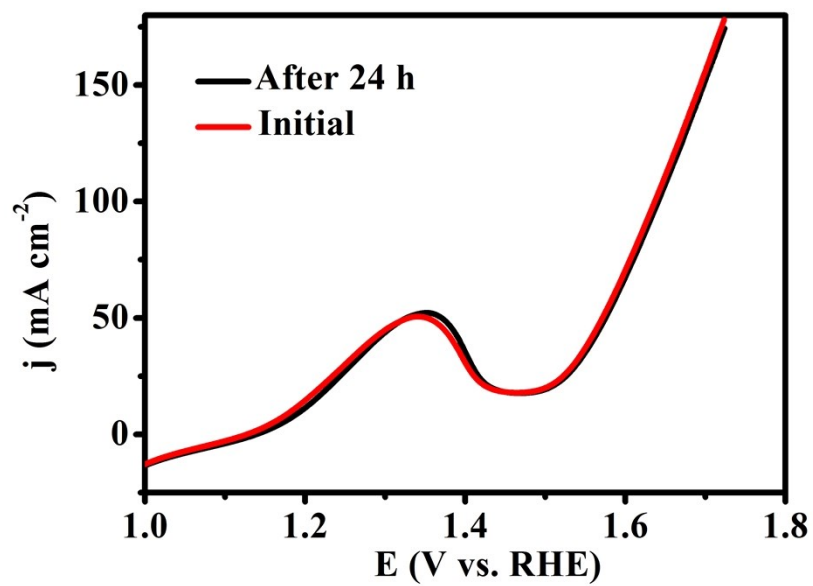

**Fig. S9.** LSV curves for CuO@NiCo LDH/CF before and after the time-dependent current density stability tests.

**Table S1.** Comparison of water oxidation performances of CuO@NiCo LDH/CF with other catalysts under alkaline conditions.

| OER catalyst                             | Current density<br>(mA cm <sup>-2</sup> ) | Corresponding<br>overpotential<br>(mV) | Electrolyte | Ref.             |
|------------------------------------------|-------------------------------------------|----------------------------------------|-------------|------------------|
| CuO@NiCo LDH/CF                          | 20                                        | 256                                    | 1 M KOH     | <b>This work</b> |
| NiCo LDH/NF                              | 10                                        | 271                                    | 1 M KOH     | 1                |
| NiCo/NiCoOx@FeOOH                        | 10                                        | 278                                    | 1 M KOH     | 2                |
| (Ni,Co) <sub>0.85</sub> Se               | 20                                        | 287                                    | 1 M KOH     | 3                |
| Co <sub>0.5</sub> Ni <sub>0.5</sub> /rGO | 10                                        | 288                                    | 1 M KOH     | 4                |
| Calixarene intercalated<br>NiCo LDH      | 10                                        | 290                                    | 1 M KOH     | 5                |
| NiCo LDH/CF                              | 10                                        | 307                                    | 1 M KOH     | 6                |
| NiCo LDH monolayers                      | 10                                        | 335                                    | 1 M KOH     | 7                |
| NiCo LDH nanocages                       | 10                                        | 350                                    | 1 M KOH     | 8                |
| NiCo LDH nanosheets                      | 10                                        | 367                                    | 1 M KOH     | 9                |
| NiFe LDH on Cu mesh                      | 10                                        | 292                                    | 1 M KOH     | 10               |
| CuO-NiO on Ni foam                       | 10                                        | 319                                    | 1 M KOH     | 11               |
| NiCo@Ru core-shell<br>nanoparticles      | 10                                        | 272                                    | 1 M KOH     | 12               |
| NiFe LDH/CuO nanosheet                   | 20                                        | 270                                    | 1 M KOH     | 13               |
| Co <sub>1</sub> Ni <sub>0.3</sub> LDHs   | 10                                        | 266                                    | 1 M KOH     | 14               |
| CoNi LDH/CoO                             | 10                                        | 300                                    | 1 M KOH     | 15               |

## References

- 1 W. Liu, J. Bao, M. Guan, Y. Zhao, J. Lian, J. Qiu, L. Xu, Y. Huang, J. Qian and H. Li, Nickel–cobalt-layered double hydroxide nanosheet arrays on Ni foam as a bifunctional electrocatalyst for overall water splitting, *Dalton Trans*, 2017, **46**, 8372–8376.
- 2 Y. Shao, M. Zheng, M. Cai, L. He and C. Xu, Improved electrocatalytic performance of core-shell NiCo/NiCoO<sub>x</sub> with amorphous FeOOH for oxygen-evolution reaction, *Electrochim. Acta*, 2017, **257**, 1–8.
- 3 K. Xiao, L. Zhou, M. Shao and M. Wei, Fabrication of (Ni,Co)<sub>0.85</sub>Se nanosheet arrays derived from layered double hydroxides toward largely enhanced overall water splitting, *J. Mater. Chem. A*, 2018, **6**, 7585–7591.
- 4 X. Zhang, K. Ding, B. Weng, S. Liu, W. Jin, X. Ji and J. Hu, Coral-like carbon-wrapped NiCo alloys derived by emulsion aggregation strategy for efficient oxygen evolution reaction, *J Colloid Interface Sci*, 2020, **573**, 96–104.
- 5 B. J. Waghmode, A. P. Gaikwad, C. V. Rode, S. D. Sathaye, K. R. Patil and D. D. Malkhede, Calixarene intercalated NiCo layered double hydroxide for enhanced oxygen evolution catalysis, *ACS Sustain. Chem. Eng.*, 2018, **6**, 9649–9660.
- 6 YC. Yu, Z. Liu, X. Han, H. Huang, C. Zhao, J. Yang and J. Qiu, NiCo-layered double hydroxides vertically assembled on carbon fiber papers as binder-free high-active electrocatalysts for water oxidation, *Carbon*, 2016, **110**, 1–7.
- 7 F. Song and X. Hu, Exfoliation of layered double hydroxides for enhanced oxygen evolution catalysis, *Nat. Commun.*, 2014, **5**, 4477.
- 8 J. Nai, H. Yin, T. You, L. Zheng, J. Zhang, P. Wang, Z. Jin, Y. Tian, J. Liu, Z. Tang and L. Guo, Efficient electrocatalytic water oxidation by using amorphous Ni–Co Double hydroxides nanocages, *Adv. Energy Mater.*, 2015, **5**, 1401880.
- 9 H. Liang, F. Meng, M. Cabán-Acevedo, L. Li, A. Forticaux, L. Xiu, Z. Wang and S. Jin, Hydrothermal continuous flow synthesis and exfoliation of NiCo Layered double hydroxide nanosheets for enhanced oxygen evolution catalysis, *Nano Lett.*, 2015, **15**, 1421–1427.

- 10 B. Chen, Z. Zhang, S. Kim, S. Lee, J. Lee, W. Kim and K. Yong, Ostwald ripening driven exfoliation to ultrathin layered double hydroxides nanosheets for enhanced oxygen evolution reaction, *ACS Appl. Mater. Interfaces*, 2018, **10**, 44518–44526.
- 11 C. Li, B. Zhang, Y. Li, S. Hao, X. Cao, G. Yang, J. Wu and Y. Huang, Self-assembled Cu-Ni bimetal oxide 3D in-plane epitaxial structures for highly efficient oxygen evolution reaction, *Appl. Catal. B Environ.*, 2019, **244**, 56–62.
- 12 H. Hwang, T. Kwon, H. Y. Kim, J. Park, A. Oh, B. Kim, H. Baik, S. H. Joo and K. Lee, Ni@Ru and NiCo@Ru core-shell hexagonal nanosandwiches with a compositionally tunable core and a regioselectively grown shell, *Small*, 2018, **14**, 1702353.
- 13 B. Lin, H. le, F. Xu and S. Mu, NiFe LDH/CuO nanosheet: a sheet-on-sheet strategy to boost the active site density towards oxygen evolution reaction, *RSC Adv.*, 2020, **10**, 27424–27427.
- 14 L. Tian, K. Wang, H. Wo, Z. Li, M. Song, J. Li, T. Li and X. Du, Construction of hierarchical bundle-like CoNi layered double hydroxides for the efficient oxygen evolution reaction, *J. Taiwan. Inst. Chem. Eng.*, 2019, **96**, 273–280.
- 15 J. Wu, Z. Ren, S. Du, L. Kong, B. Liu, W. Xi, J. Zhu and H. Fu, A highly active oxygen evolution electrocatalyst: ultrathin CoNi double hydroxide/CoO nanosheets synthesized via interface-directed assembly, *Nano Res.*, 2016, **9**, 713–725.
